# Supplementary material
Source: PubMed Central journal article supplement (PMC3406120)
Supplement: AEM.00455-12_zam999103514so1.pdf [file AEM.00455-12_zam999103514so1.pdf]

SUPPLEMENTAL MATERIAL

| Strain or plasmid                                                    | Description                                                                                                                            | Source reference          | or |
|----------------------------------------------------------------------|----------------------------------------------------------------------------------------------------------------------------------------|---------------------------|----|
| <i>E. coli</i> DH5 $\alpha$                                          | F- $\phi$ 80/ <i>lacZ</i> $\Delta$ M15 $\Delta$ ( <i>lacZYA-argF</i> ) U169 <i>rec1A end1A hsdR17 gyrA96 supE4 4thi-1 relA1</i>        | Invitrogen (Carlsbad, CA) |    |
| <i>L. lactis</i> strains                                             |                                                                                                                                        |                           |    |
| MG1363 (=MGwt)                                                       | <i>L. lactis</i> subsp. <i>cremoris</i> plasmid-free derivative of NCDO712 (Prt <sup>-</sup> , Lac <sup>-</sup> ).                     | 2                         |    |
| NZ9000                                                               | Derivative of MG1363 carrying <i>pepN::nisRK</i>                                                                                       | 3                         |    |
| HB21 (=MGLac <sup>+</sup> )                                          | Lac <sup>+</sup> derivative of MG1363, carrying an A to G transition at nt 174861 in the genome sequence at NCBI (Acc. Nr.: NC_009004) | This work                 |    |
| MGLac <sup>+</sup> <i>nisRK</i>                                      | MGLac <sup>+</sup> carrying <i>pseudo10::nisRK</i>                                                                                     | This work                 |    |
| MGLac <sup>+</sup> <i>nisRK</i> $\Delta$ <i>celB</i>                 | MGLac <sup>+</sup> <i>nisRK</i> carrying a chromosomal deletion of <i>celB</i>                                                         | This work                 |    |
| MGLac <sup>+</sup> $\Delta$ <i>ptcBA</i>                             | MGLac <sup>+</sup> carrying a chromosomal deletion of <i>ptcBA</i>                                                                     | This work                 |    |
| MGLac <sup>+</sup> $\Delta$ <i>bgIS</i>                              | MGLac <sup>+</sup> carrying a chromosomal deletion of <i>bgIS</i>                                                                      | This work                 |    |
| MGLac <sup>+</sup> <i>Pcel-gfp</i>                                   | MGLac <sup>+</sup> carrying a single chromosomal copy of pSEUDO:: <i>Pcel-gfp</i>                                                      | This work                 |    |
| MGLac <sup>+</sup> <i>Pcel*-gfp</i>                                  | MGLac <sup>+</sup> carrying a single chromosomal copy of pSEUDO:: <i>Pcel*-gfp</i>                                                     | This work                 |    |
| MGLac <sup>+</sup> $\Delta$ <i>ccpA</i> <i>Pcel*-gfp</i>             | MGLac <sup>+</sup> carrying a chromosomal deletion of <i>ccpA</i> .                                                                    |                           |    |
| MGLac <sup>+</sup> <i>nisRK</i> $\Delta$ <i>celB</i> pNZ <i>celB</i> | Derivative of MGLac <sup>+</sup> <i>nisRK</i> with deletion of <i>celB</i> carrying pNZ <i>celB</i>                                    | This work                 |    |
| Plasmids                                                             |                                                                                                                                        |                           |    |

|                                           |                                                                                                                    |           |                                    |
|-------------------------------------------|--------------------------------------------------------------------------------------------------------------------|-----------|------------------------------------|
| pSEUDO-GFP                                | Em <sup>r</sup> , with GFP-SF, for integration in <i>L. lactis</i> pseudogene 10                                   | 5         |                                    |
| pJWV102_gfp                               | Amp <sup>r</sup> , Tet <sup>r</sup> , with <i>gfp</i> * behind <i>PczcD</i>                                        |           | Veening, manuscript in preparation |
| pSEUDO-gfp*                               | Em <sup>r</sup> , derivative of pSEUDO-GFP carrying <i>gfp</i> * for integration in <i>L. lactis</i> pseudogene 10 | This work |                                    |
| pCS1966:: <i>pseudo10</i> :: <i>nisRK</i> | Em <sup>r</sup> , with <i>nisRK</i> genes, for integration in <i>L. lactis</i> pseudogene 10                       | 5         |                                    |
| pNZ8048                                   | Cm <sup>r</sup> , gene expression vector carrying a nisin-inducible <i>PnisA</i>                                   | 1         |                                    |
| pNZ <i>celB</i>                           | pNZ8048 <i>celB</i> behind <i>PnisA</i>                                                                            |           | This work                          |
| pILORI4                                   | Em <sup>r</sup> ; pIL252 carrying the multiple cloning site and promoterless <i>lacZ</i> of pORI13                 | 4         |                                    |
| pILORI4:: <i>Pcel</i>                     | pILORI4, <i>lacZ</i> behind <i>Pcel</i>                                                                            |           | This work                          |
| pILORI4:: <i>Pcel</i> *                   | pILORI4, <i>lacZ</i> behind <i>Pcel</i> *                                                                          |           | This work                          |
| pCS1966                                   | Em <sup>r</sup> , <i>L. lactis</i> integration vector, OroP-based selection                                        | 6         |                                    |
| pCS1966- <i>celB</i> '                    | pCS1966 containing <i>celB</i> deletion construct                                                                  |           | This work                          |
| pCS1966- <i>ptcBA</i> '                   | pCS1966 containing <i>ptcBA</i> deletion construct                                                                 |           | This work                          |
| pCS1966- <i>bgIS</i> '                    | pCS1966 containing <i>bgIS</i> deletion construct                                                                  |           | This work                          |
| pCS1966- <i>ccpA</i> '                    | pCS1966 containing <i>ccpA</i> deletion construct                                                                  |           | This work                          |
| pSEUDO:: <i>Pcel</i> -gfp                 | pSEUDO-gfp* with <i>Pcel</i>                                                                                       |           | This work                          |
| pSEUDO:: <i>Pcel</i> *-gfp                | pSEUDO-gfp* with <i>Pcel</i> *                                                                                     |           | This work                          |

## S1. Strains and plasmids used in this study.

| Primer       | Sequence (5'to 3')                    | Enzyme       |
|--------------|---------------------------------------|--------------|
| KocelB1F     | GCATTCTAGACAGACGGTGTTCGACTTGAC        | <i>XbaI</i>  |
| KocelB2R     | GCATGGATCCCGCAGTAATCCGTTTCATGG        | <i>BamHI</i> |
| KocelB3F     | GCATGGATCCCGCAGCTAACAAGTTGGAAG        | <i>BamHI</i> |
| KocelB4R     | CGTACTCGAGGATTCCCAGCCGCCATACAG        | <i>XhoI</i>  |
| KoPtcBA1F    | GCATTCTAGATCGGGATTTGGCAAGTCAGG        | <i>XbaI</i>  |
| KoPtcBA2R    | GCATGGATCCGCACATGCAAGTGCAATAAC        | <i>BamHI</i> |
| KoPtcBA3F    | GCATGGATCCCAAGAACGACGCCTTCAAGC        | <i>BamHI</i> |
| KoPtcBA4R    | CGTACTCGAGGGTAATTGCCTCGTTAAGTC        | <i>XhoI</i>  |
| Pllmg_0186ZR | GCATTCTAGATCCGCCTCAAAGTTTGAACG        | <i>XbaI</i>  |
| Pllmg_0186F  | CCGCTAGCATGCAAGCCATACTTCGTGAATAC      | <i>SphI</i>  |
| CelB_F       | AGATCCATGGATGAACGGAATTACTGCGTGGATGGAG | <i>NcoI</i>  |
| CelB_Rev     | GATCTCTAGATAAATCTTACCAGATTTAAC        | <i>XbaI</i>  |
| KobglS1F     | GCATTCTAGATCGTTATCTGGGTACCATTC        | <i>XbaI</i>  |
| KobglS2Rev   | GCATGGATCCTTCCATATTATCCCCACTGG        | <i>BamHI</i> |
| KobglS3F     | GCATGGATCCAAACAAAGAGCACTCAAGTG        | <i>BamHI</i> |
| KobglS4Rev   | CGTACTCGAGCTTTGAAAGCCTCCGTTTAC        | <i>XhoI</i>  |
| CelB_F       | AGATCCATGGATGAACGGAATTACTGCGTGGATGGAG | <i>NcoI</i>  |
| CelB_R       | GATCTCTAGATAAATCTTACCAGATTTAAC        | <i>XbaI</i>  |
| 0186_1Rev    | TCCACCATCACTTCCATTCC                  | -            |
| 0186_2Rev    | TGATTGGCATAATTTACAAC                  | -            |
| 0186_3Rev    | AAAGCTGCAAGTACTCCTTC                  | -            |
| 0186_4Rev    | GCAAGTACTCCTTCTTTATC                  | -            |
| gfp_sf_F     | GCATCTCGAGTACTGATTAATAAAGGAGGACAAAC   | <i>XhoI</i>  |
| gfp_sf_R     | CGATGGATCCGAAATACGGGCAGACATGGC        | <i>BamHI</i> |

S2. Primers used in this study.

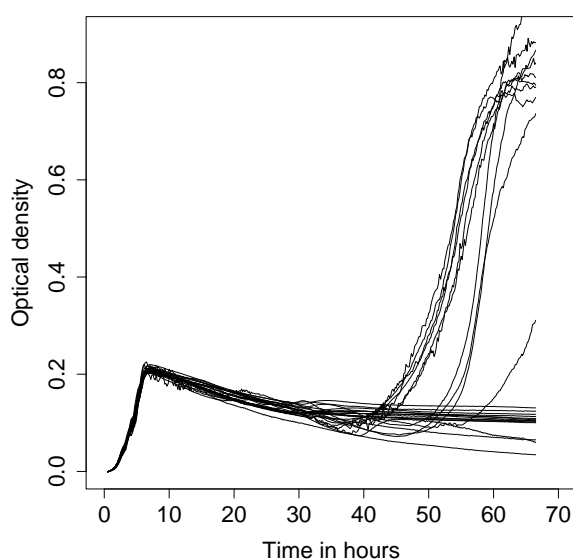

S3. Growth of 24 individual cultures of MG1363(Lac<sup>-</sup>) in M17 medium supplemented with lactose. All the cultures eventually started to grow on lactose.

| Gene name        | Locus            | Bayesian p | Fold | Function                                              |
|------------------|------------------|------------|------|-------------------------------------------------------|
| <i>llmg_0186</i> | <i>llmg_0186</i> | 2.68E-10   | 85.6 | outer surface protein, $\beta$ -glucosidase motif     |
| <i>galP</i>      | <i>llmg_2237</i> | 2.61E-10   | 40.9 | galactose permease, the Leloir pathway                |
| <i>llmg_0188</i> | <i>llmg_0188</i> | 6.96E-06   | 38.5 | protein of unknown function                           |
| <i>celB</i>      | <i>llmg_0187</i> | 6.53E-06   | 37.1 | PTS system, cellobiose-specific IIC component         |
| <i>hadL</i>      | <i>llmg_0254</i> | 4.88E-09   | 26.5 | cryptic haloacid dehalogenase                         |
| <i>galM</i>      | <i>llmg_2236</i> | 2.94E-10   | 24.7 | galactose mutarotase, the Leloir pathway              |
| <i>metC</i>      | <i>llmg_1776</i> | 1.34E-09   | 24.6 | cystathionine gamma-synthase                          |
| <i>galK</i>      | <i>llmg_2235</i> | 5.69E-10   | 22.0 | galactokinase, the Leloir pathway                     |
| <i>tnp905</i>    | <i>llmg_2493</i> | 7.17E-10   | 17.4 | transposase for insertion sequence element IS905N     |
| <i>oppF</i>      | <i>llmg_0698</i> | 5.03E-09   | 16.0 | oligopeptide transport ATP-ase                        |
| <i>cysK</i>      | <i>llmg_1775</i> | 1.28E-08   | 14.3 | O-acetylserine sulfhydrylase                          |
| <i>llmg_2164</i> | <i>llmg_2164</i> | 1.44E-09   | 14.0 | protein of unknown function, CesSR regulon            |
| <i>cspA</i>      | <i>llmg_1847</i> | 4.97E-09   | 11.9 | cold shock-like protein CspA                          |
| <i>tnp905</i>    | <i>llmg_2493</i> | 1.35E-08   | 10.7 | transposase for insertion sequence element IS905N     |
| <i>llmg_1330</i> | <i>llmg_1330</i> | 4.87E-09   | 9.7  | putative membrane protein                             |
| <i>llmg_0334</i> | <i>llmg_0334</i> | 2.89E-07   | 8.8  | putative thiamine transporter                         |
| <i>oppA</i>      | <i>llmg_0701</i> | 2.71E-08   | 8.7  | oligopeptide transport ATP-ase                        |
| <i>oppB</i>      | <i>llmg_0699</i> | 4.62E-06   | 8.3  | oligopeptide transport ATP-ase                        |
| <i>adhE</i>      | <i>llmg_2432</i> | 6.94E-08   | 8.3  | bifunctional acetaldehyde-CoA/alcohol dehydrogenase   |
| <i>plpB</i>      | <i>llmg_0336</i> | 2.48E-08   | 8.2  | D-methionine-binding lipoprotein precursor            |
| <i>thiE</i>      | <i>llmg_1218</i> | 1.08E-07   | 7.9  | thiamine-phosphate pyrophosphorylase                  |
| <i>galT</i>      | <i>llmg_2234</i> | 1.09E-08   | 7.9  | galactose 1-P uridylyltransferase, the Leloir pathway |
| <i>oppC</i>      | <i>llmg_0700</i> | 3.72E-07   | 7.7  | oligopeptide transport ATP-ase                        |
| <i>oppD</i>      | <i>llmg_0697</i> | 1.12E-07   | 7.5  | oligopeptide transport ATP-ase                        |

|                      |                      |          |     |                                                 |
|----------------------|----------------------|----------|-----|-------------------------------------------------|
| <i>pfl</i>           | <i>llmg_0629</i>     | 1.57E-08 | 7.4 | pyruvate formate lyase                          |
| <i>llmg_0301</i>     | <i>llmg_0301</i>     | 3.52E-08 | 7.2 | MerR family transcriptional regulator           |
| <i>ps431</i>         | <i>llmg_2111</i>     | 8.05E-07 | 7.1 | pseudogene (prophage gene)                      |
| <i>galE</i>          | <i>llmg_2233</i>     | 2.27E-07 | 7.1 | UDP-galactose-4-epimerase, the Leloir pathway   |
| <i>argG</i>          | <i>llmg_0138</i>     | 8.52E-08 | 7.1 | arginine metabolism                             |
| <i>llmg_2163</i>     | <i>llmg_2163</i>     | 1.01E-07 | 7.0 | protein of unknown function, CesSR regulon      |
| <i>argH</i>          | <i>llmg_0139</i>     | 3.01E-08 | 7.0 | arginine metabolism                             |
| <i>llmg_pseudo02</i> | <i>llmg_pseudo02</i> | 7.05E-08 | 6.9 | pseudogene 02 (MFS transporter)                 |
| <i>llmg_0281</i>     | <i>llmg_0281</i>     | 2.09E-08 | 6.3 | anaerobic ribonucleoside triphosphate reductase |
| <i>murB</i>          | <i>llmg_1329</i>     | 7.19E-08 | 6.2 | UDP-N-acetylenolpyruvoylglucosamine reductase   |
| <i>busAB</i>         | <i>llmg_1049</i>     | 5.31E-08 | 6.1 | glycine betaine/proline ABC transporter         |
| <i>noxE</i>          | <i>llmg_0408</i>     | 1.38E-08 | 6.0 | NADH oxidase                                    |
| <i>vacB1</i>         | <i>llmg_1586</i>     | 1.94E-08 | 6.0 | exoribonuclease                                 |
| <i>pyrB</i>          | <i>llmg_0893</i>     | 2.87E-08 | 5.5 | pyrimidine metabolism                           |
| <i>vacB1</i>         | <i>llmg_1586</i>     | 5.99E-08 | 5.3 | exoribonuclease                                 |
| <i>llmg_0099</i>     | <i>llmg_0099</i>     | 3.85E-08 | 5.1 | 50S ribosomal protein L32                       |
| <i>cspD2</i>         | <i>llmg_1238</i>     | 4.11E-05 | 5.0 | cold shock-like protein                         |
| <i>llmg_2194</i>     | <i>llmg_2194</i>     | 9.30E-08 | 4.9 | protein of unknown function                     |
| <i>llmg_0070</i>     | <i>llmg_0070</i>     | 8.25E-08 | 4.8 | putative permease                               |
| <i>pyrC</i>          | <i>llmg_1508</i>     | 1.95E-06 | 4.6 | pyrimidine metabolism                           |
| <i>llmg_2322</i>     | <i>llmg_2322</i>     | 1.86E-07 | 4.6 | protein of unknown function                     |
| <i>nusG</i>          | <i>llmg_2388</i>     | 2.69E-06 | 4.6 | transcription antitermination protein           |
| <i>carA</i>          | <i>llmg_0894</i>     | 5.15E-07 | 4.5 | carbamoyl phosphate synthase                    |
| <i>ahpC</i>          | <i>llmg_0356</i>     | 2.91E-07 | 4.5 | alkyl hydroperoxide reductase subunit C         |
| <i>cspD</i>          | <i>llmg_1256</i>     | 1.86E-06 | 4.5 | cold shock-like protein                         |
| <i>llmg_0333</i>     | <i>llmg_0333</i>     | 2.39E-06 | 4.4 | tRNA synthetase                                 |
| <i>pyrP</i>          | <i>llmg_0891</i>     | 3.33E-07 | 4.3 | pyrimidine metabolism                           |
| <i>bgIS</i>          | <i>llmg_0190</i>     | 1.23E-07 | 4.1 | phospho-β-glucosidase                           |
| <i>mvaA</i>          | <i>llmg_0931</i>     | 6.90E-07 | 4.0 | hydroxymethylglutaryl-CoA reductase             |
| <i>plpD</i>          | <i>llmg_0340</i>     | 3.98E-07 | 4.0 | D-methionine-binding lipoprotein precursor      |
| <i>glnA</i>          | <i>llmg_2484</i>     | 2.11E-06 | 3.9 | glutamine synthetase                            |
| <i>llmg_1920</i>     | <i>llmg_1920</i>     | 1.99E-05 | 3.8 | HD superfamily hydrolase                        |
| <i>busAA</i>         | <i>llmg_1048</i>     | 3.76E-07 | 3.8 | glycine betaine/proline ABC transporter         |
| <i>hrcA</i>          | <i>llmg_1576</i>     | 2.40E-07 | 3.7 | heat-inducible transcription repressor          |
| <i>llmg_0300</i>     | <i>llmg_0300</i>     | 4.39E-07 | 3.7 | protein of unknown function                     |
| <i>metE2</i>         | <i>llmg_1849</i>     | 1.38E-06 | 3.7 | cysteine and methionine metabolism              |
| <i>llmg_1103</i>     | <i>llmg_1103</i>     | 3.59E-07 | 3.7 | protein of unknown function                     |
| <i>argE</i>          | <i>llmg_0536</i>     | 3.59E-05 | 3.7 | arginine metabolism                             |
| <i>pmi</i>           | <i>llmg_1789</i>     | 1.33E-06 | 3.7 | mannose-6-phosphate isomerase                   |
| <i>llmg_0877</i>     | <i>llmg_0877</i>     | 5.94E-05 | 3.6 | proten of unknown function                      |
| <i>llmg_1806</i>     | <i>llmg_1806</i>     | 5.20E-07 | 3.6 | protein of unknown function                     |
| <i>llmg_0872</i>     | <i>llmg_0872</i>     | 2.54E-07 | 3.6 | protein of unknown function                     |
| <i>rplM</i>          | <i>llmg_2546</i>     | 3.53E-06 | 3.6 | ribosomal protein                               |
| <i>rpsA</i>          | <i>llmg_1724</i>     | 2.45E-05 | 3.6 | ribosomal protein                               |
| <i>llmg_1811</i>     | <i>llmg_1811</i>     | 2.35E-07 | 3.5 | tRNA (guanine-N(7))-methyltransferase           |
| <i>gnd</i>           | <i>llmg_0586</i>     | 1.18E-06 | 3.5 | 6-phosphogluconate dehydrogenase                |

|                  |                      |             |     |                                                                        |
|------------------|----------------------|-------------|-----|------------------------------------------------------------------------|
| <i>dnal</i>      | <i>llmg_1808</i>     | 7.12E-07    | 3.5 | primosomal protein Dnal                                                |
| <i>llmg_0508</i> | <i>llmg_0508</i>     | 9.98E-07    | 3.5 | cysteine synthase                                                      |
| <i>rplS</i>      | <i>llmg_1671</i>     | 0.000160381 | 3.4 | ribosomal protein                                                      |
| <i>llmg_1762</i> | <i>llmg_1762</i>     | 5.19E-06    | 3.4 | protein of unknown function                                            |
| <i>pepT</i>      | <i>llmg_1994</i>     | 3.21E-06    | 3.3 | tripeptide aminopeptidase                                              |
| <i>llmg_0417</i> | <i>llmg_0417</i>     | 1.81E-06    | 3.3 | protein of unknown function                                            |
| <i>llmg_0097</i> | <i>llmg_0097</i>     | 1.91E-06    | 3.3 | putative flavoprotein oxygenase                                        |
| <i>noxB</i>      | <i>llmg_1734</i>     | 2.07E-06    | 3.3 | NADH dehydrogenase                                                     |
| <i>llmg_1584</i> | <i>llmg_1584</i>     | 8.51E-07    | 3.3 | phosphatase                                                            |
| <i>enoB</i>      | <i>llmg_pseudo08</i> | 1.72E-06    | 3.3 | pseudogene 08 (enolase)                                                |
| <i>llmg_1807</i> | <i>llmg_1807</i>     | 1.26E-06    | 3.3 | nitroreductase family protein                                          |
| <i>rplM</i>      | <i>llmg_2546</i>     | 9.53E-06    | 3.2 | ribonuclease HIII                                                      |
| <i>guaB</i>      | <i>llmg_0230</i>     | 2.68E-06    | 3.2 | inositol-5-monophosphate dehydrogenase                                 |
| <i>llmg_0095</i> | <i>llmg_0095</i>     | 2.20E-06    | 3.1 | putative esterase                                                      |
| <i>dnaB</i>      | <i>llmg_1809</i>     | 3.42E-06    | 3.1 | chromosome replication initiation/membrane attachment protein          |
| <i>llmg_1089</i> | <i>llmg_1089</i>     | 9.11E-06    | 3.1 | protein of unknown function                                            |
| <i>fruC</i>      | <i>llmg_1569</i>     | 5.51E-05    | 3.0 | 1-phosphofructokinase                                                  |
| <i>pepC</i>      | <i>llmg_2069</i>     | 1.02E-06    | 3.0 | hydrolase                                                              |
| <i>pyrF</i>      | <i>llmg_1107</i>     | 1.31E-06    | 3.0 | pyrimidine metabolism                                                  |
| <i>pepN</i>      | <i>llmg_0319</i>     | 2.87E-06    | 3.0 | pepidase N                                                             |
| <i>llmg_0873</i> | <i>llmg_0873</i>     | 1.78E-06    | 3.0 | protein of unknown function                                            |
| <i>thiD1</i>     | <i>llmg_1217</i>     | 2.53E-05    | 2.9 | phosphomethylpyrimidine kinase                                         |
| <i>llmg_1127</i> | <i>llmg_1127</i>     | 5.63E-06    | 2.9 | protein of unknown function                                            |
| <i>glnR</i>      | <i>llmg_2485</i>     | 0.00016258  | 2.9 | glutamine synthetase repressor                                         |
| <i>busAB</i>     | <i>llmg_1049</i>     | 1.53E-05    | 2.9 | glycine betaine/proline ABC transporter                                |
| <i>llmg_1550</i> | <i>llmg_1550</i>     | 3.96E-06    | 2.9 | GroEI-homologous protein                                               |
| <i>llmg_0506</i> | <i>llmg_0506</i>     | 2.64E-06    | 2.8 | cell wall-associated protein                                           |
| <i>gerCA</i>     | <i>llmg_1111</i>     | 4.18E-06    | 2.8 | heptaprenyl diphosphate synthase component I                           |
| <i>cmhR</i>      | <i>llmg_0947</i>     | 3.82E-06    | 2.8 | transcriptional regulator                                              |
| <i>noxA</i>      | <i>llmg_1735</i>     | 1.26E-06    | 2.8 | NADH dehydrogenase                                                     |
| <i>fruA</i>      | <i>llmg_1568</i>     | 3.34E-06    | 2.8 | PTS system, fructose specific IIBC components                          |
| <i>fruR</i>      | <i>llmg_1570</i>     | 1.68E-05    | 2.8 | lactose transport regulator, fructose operon transcriptional repressor |
| <i>nadR</i>      | <i>llmg_2241</i>     | 5.76E-06    | 2.8 | putative nicotinamide-nucleotide adenylyltransferase                   |
| <i>llmg_0781</i> | <i>llmg_0781</i>     | 0.000189108 | 2.7 | protein of unknown function                                            |
| <i>vicX</i>      | <i>llmg_0412</i>     | 2.02E-06    | 2.7 | ribonuclease Z                                                         |
| <i>llmg_0704</i> | <i>llmg_0704</i>     | 5.69E-06    | 2.7 | protein of unknown function                                            |
| <i>thrC</i>      | <i>llmg_2387</i>     | 4.19E-06    | 2.7 | threonine synthase                                                     |
| <i>menE</i>      | <i>llmg_1832</i>     | 3.38E-06    | 2.7 | O-succinylbenzoic acid-CoA ligase                                      |
| <i>aldC</i>      | <i>llmg_1464</i>     | 3.02E-06    | 2.7 | acetolactate decarboxylase, butanoate metabolism                       |
| <i>rpsF</i>      | <i>llmg_2475</i>     | 0.000128226 | 2.6 | ribosomal protein                                                      |
| <i>oppB2</i>     | <i>llmg_2026</i>     | 7.03E-05    | 2.6 | peptide ABC transporter                                                |
| <i>menA</i>      | <i>llmg_0197</i>     | 2.56E-05    | 2.6 | 1,4-dihydroxy-2-naphthoate octaprenyltransferase                       |
| <i>llmg_0685</i> | <i>llmg_0685</i>     | 8.28E-05    | 2.6 | protein of unknown function                                            |
| <i>llmg_2386</i> | <i>llmg_2386</i>     | 6.76E-06    | 2.6 | putative MATE family transporter                                       |
| <i>llmg_2423</i> | <i>llmg_2423</i>     | 8.10E-06    | 2.6 | protein of unknown function                                            |

|                  |                  |             |       |                                                        |
|------------------|------------------|-------------|-------|--------------------------------------------------------|
| <i>pyrR</i>      | <i>llmg_0890</i> | 1.92E-05    | 2.6   | pyrimidine metabolism                                  |
| <i>dar</i>       | <i>llmg_0339</i> | 6.55E-06    | 2.6   | acetoin(diacetyl)reductase                             |
| <i>rpmE</i>      | <i>llmg_0906</i> | 5.08E-06    | 2.6   | ribosomal protein                                      |
| <i>rpsD</i>      | <i>llmg_0296</i> | 0.000121058 | 2.6   | ribosomal protein                                      |
| <i>rpsL</i>      | <i>llmg_2558</i> | 6.96E-06    | 2.6   | ribosomal protein                                      |
| <i>llmg_0007</i> | <i>llmg_0007</i> | 2.24E-05    | 2.6   | protein of unknown function                            |
| <i>thiL</i>      | <i>llmg_0930</i> | 5.36E-06    | 2.6   | acetyl-CoA C-acetyltransferase                         |
| <i>rex</i>       | <i>llmg_1514</i> | 6.13E-06    | 2.5   | redox-sensing transcriptional repressor Rex            |
| <i>llmg_0241</i> | <i>llmg_0241</i> | 2.68E-05    | 2.5   | protein of unknown function                            |
| <i>llmg_0538</i> | <i>llmg_0538</i> | 0.000248717 | 2.5   | protein of unknown function                            |
| <i>pgk</i>       | <i>llmg_0253</i> | 5.51E-05    | 2.5   | phosphoglycerate kinase                                |
| <i>mntH</i>      | <i>llmg_1490</i> | 3.62E-06    | 2.5   | putative proton-dependent manganese transporter        |
| <i>ispB</i>      | <i>llmg_1110</i> | 4.46E-06    | 2.5   | heptaprenyl diphosphate synthase component II          |
| <i>kinD</i>      | <i>llmg_1649</i> | 1.20E-05    | 2.5   | CesS sensor kinase                                     |
| <i>frdC</i>      | <i>llmg_1441</i> | 6.78E-06    | 2.5   | fumarate reductase flavoprotein subunit                |
| <i>arcB</i>      | <i>llmg_2312</i> | 9.00E-10    | -92.9 | ornithine carbamoyltransferase                         |
| <i>arcD1</i>     | <i>llmg_2311</i> | 1.33E-06    | -48.7 | arginine/ornithine antiporter                          |
| <i>arcA</i>      | <i>llmg_2313</i> | 6.53E-09    | -48.7 | arginine deiminase                                     |
| <i>arcC1</i>     | <i>llmg_2310</i> | 2.53E-06    | -44.9 | carbamate kinase                                       |
| <i>arcC2</i>     | <i>llmg_2309</i> | 4.85E-06    | -39.5 | carbamate kinase                                       |
| <i>llmg_0959</i> | <i>llmg_0959</i> | 1.06E-07    | -31.8 | $\beta$ -glucosidase                                   |
| <i>pgmB</i>      | <i>llmg_0456</i> | 9.94E-07    | -26.9 | $\beta$ -phosphoglucomutase                            |
| <i>llmg_0960</i> | <i>llmg_0960</i> | 9.22E-07    | -23.4 | $\beta$ -glucosidase                                   |
| <i>yfiA</i>      | <i>llmg_0616</i> | 7.14E-08    | -18.6 | putative sigma 54 modulation protein                   |
| <i>trePP</i>     | <i>llmg_0455</i> | 2.53E-05    | -16.9 | putative trehalose/maltose hydrolase                   |
| <i>rpe2</i>      | <i>llmg_0957</i> | 1.67E-07    | -16.1 | ribulose phosphate 3-epimerase                         |
| <i>mtlR</i>      | <i>llmg_0023</i> | 5.64E-09    | -12.8 | transcriptional regulator mtl mannitol operon MtlR     |
| <i>llmg_0454</i> | <i>llmg_0454</i> | 8.45E-06    | -8.3  | $\beta$ -glucoside-specific PTS system IIABC component |
| <i>als</i>       | <i>llmg_1309</i> | 2.37E-08    | -7.8  | acetolactate synthase                                  |
| <i>TrePP</i>     | <i>llmg_0455</i> | 0.000260121 | -7.5  | putative trehalose/maltose hydrolase                   |
| <i>glpD</i>      | <i>llmg_1098</i> | 1.28E-08    | -7.3  | glycerol 3-phosphate dehydrogenase                     |
| <i>llmg_1990</i> | <i>llmg_1990</i> | 9.09E-05    | -6.9  | protein of unknown function                            |
| <i>glpD</i>      | <i>llmg_1098</i> | 1.15E-07    | -6.8  | glycerol 3-phosphate dehydrogenase                     |
| <i>rpiB</i>      | <i>llmg_0958</i> | 0.000159752 | -6.1  | ribose 5-phosphate isomerase B                         |
| <i>arcT</i>      | <i>llmg_2308</i> | 1.69E-08    | -6.0  | arginine deiminase pathway                             |
| <i>llmg_2431</i> | <i>llmg_2431</i> | 2.16E-08    | -5.8  | protein of unknown function                            |
| <i>llmg_1299</i> | <i>llmg_1299</i> | 5.47E-08    | -5.3  | protein of unknown function                            |
| <i>llmg_1302</i> | <i>llmg_1302</i> | 9.10E-07    | -5.3  | putative membrane protein                              |
| <i>adhA</i>      | <i>llmg_1991</i> | 5.62E-07    | -5.1  | alcohol dehydrogenase                                  |
| <i>glpF2</i>     | <i>llmg_1097</i> | 3.81E-07    | -4.8  | glycerol uptake facilitator                            |
| <i>mtlF</i>      | <i>llmg_0024</i> | 0.001312068 | -4.8  | PTS system, mannitol-specific IIA component            |
| <i>llmg_1300</i> | <i>llmg_1300</i> | 9.13E-06    | -4.6  | protein of unknown function                            |
| <i>llmg_1385</i> | <i>llmg_1385</i> | 1.52E-07    | -4.4  | protein of unknown function                            |
| <i>llmg_1301</i> | <i>llmg_1301</i> | 9.02E-07    | -4.3  | protein of unknown function                            |
| <i>gntP</i>      | <i>llmg_2467</i> | 3.69E-06    | -4.1  | gluconate:H <sup>+</sup> symporter                     |
| <i>mtlA</i>      | <i>llmg_0022</i> | 2.07E-07    | -4.1  | PTS system, mannitol-specific IIBC component           |

|                  |                  |             |      |                                                        |
|------------------|------------------|-------------|------|--------------------------------------------------------|
| <i>rpsN</i>      | <i>llmg_2370</i> | 7.06E-06    | -4.1 | ribosomal protein                                      |
| <i>orf24</i>     | <i>llmg_1384</i> | 3.18E-07    | -3.9 | protein of unknown function                            |
| <i>rbsD</i>      | <i>llmg_0786</i> | 4.09E-06    | -3.9 | ribosomal protein                                      |
| <i>rgpE</i>      | <i>llmg_0216</i> | 2.76E-07    | -3.8 | glycosyltransferase                                    |
| <i>rgpF</i>      | <i>llmg_0217</i> | 5.88E-07    | -3.8 | rhamnosyltransferase                                   |
| <i>rbsC</i>      | <i>llmg_0788</i> | 5.33E-05    | -3.8 | ribosomal protein                                      |
| <i>llmg_1303</i> | <i>llmg_1303</i> | 1.10E-06    | -3.8 | tryptophan-rich sensory protein                        |
| <i>llmg_1396</i> | <i>llmg_1396</i> | 1.20E-06    | -3.8 | protein of unknown function                            |
| <i>ltrD</i>      | <i>llmg_1375</i> | 2.28E-06    | -3.8 | LtrD protein                                           |
| <i>ltrC</i>      | <i>llmg_1376</i> | 1.96E-06    | -3.8 | putative DNA primase                                   |
| <i>glgD</i>      | <i>llmg_1873</i> | 6.08E-07    | -3.7 | protein of unknown function                            |
| <i>llmg_1468</i> | <i>llmg_1468</i> | 1.22E-06    | -3.6 | protein of unknown function                            |
| <i>llmg_1497</i> | <i>llmg_1497</i> | 1.25E-06    | -3.5 | putative hydrolase                                     |
| <i>orf30</i>     | <i>llmg_1377</i> | 1.48E-05    | -3.5 | protein of unknown function                            |
| <i>matR</i>      | <i>llmg_1371</i> | 5.34E-07    | -3.5 | maturase                                               |
| <i>clpB</i>      | <i>llmg_0986</i> | 5.50E-07    | -3.5 | ATP-dependent Clp protease                             |
| <i>ascB</i>      | <i>llmg_0751</i> | 5.62E-05    | -3.4 | 6-phospho- $\beta$ -glucosidase                        |
| <i>rplE</i>      | <i>llmg_2371</i> | 1.74E-06    | -3.4 | ribosomal protein                                      |
| <i>llmg_0286</i> | <i>llmg_0286</i> | 5.86E-07    | -3.4 | protein of unknown function                            |
| <i>phoU</i>      | <i>llmg_1895</i> | 2.31E-06    | -3.3 | phosphate transport system regulator                   |
| <i>orf28</i>     | <i>llmg_1379</i> | 1.44E-06    | -3.3 | protein of unknown function                            |
| <i>orf26</i>     | <i>llmg_1382</i> | 3.47E-05    | -3.2 | protein of unknown function                            |
| <i>chb</i>       | <i>llmg_2200</i> | 5.51E-05    | -3.2 | putative chitin binding protein                        |
| <i>rplX</i>      | <i>llmg_2372</i> | 5.54E-06    | -3.2 | ribosomal protein                                      |
| <i>cstA</i>      | <i>llmg_0430</i> | 7.43E-07    | -3.2 | carbon starvation protein A                            |
| <i>llmg_0453</i> | <i>llmg_0453</i> | 4.53E-05    | -3.1 | PTS system, $\beta$ -glucosides-specific IIA component |
| <i>llmg_0963</i> | <i>llmg_0963</i> | 0.000315217 | -3.1 | PTS system, IIC component                              |
| <i>llmg_2465</i> | <i>llmg_2465</i> | 1.45E-06    | -3.1 | protein of unknown function                            |
| <i>llrA</i>      | <i>llmg_0908</i> | 5.81E-06    | -3.0 | two-component system regulator llrA                    |
| <i>llmg_0047</i> | <i>llmg_0047</i> | 2.71E-06    | -3.0 | protein of unknown function                            |
| <i>llmg_1496</i> | <i>llmg_1496</i> | 2.12E-06    | -3.0 | protein of unknown function                            |
| <i>mtIA</i>      | <i>llmg_0022</i> | 1.58E-06    | -3.0 | PTS system, mannitol-specific IIBC component           |
| <i>llmg_0228</i> | <i>llmg_0228</i> | 1.83E-06    | -3.0 | protein of unknown function                            |
| <i>llmg_0053</i> | <i>llmg_0053</i> | 1.70E-05    | -2.9 | protein of unknown function                            |
| <i>rpsN</i>      | <i>llmg_2370</i> | 0.000431286 | -2.9 | ribosomal protein                                      |
| <i>ptcA</i>      | <i>llmg_0438</i> | 2.63E-06    | -2.9 | cellobiose-specific PTS IIA component                  |
| <i>orf18</i>     | <i>llmg_1390</i> | 2.26E-05    | -2.9 | protein of unknown function                            |
| <i>orf22</i>     | <i>llmg_1386</i> | 3.43E-05    | -2.9 | protein of unknown function                            |
| <i>llmg_1993</i> | <i>llmg_1993</i> | 5.54E-05    | -2.8 | protein of unknown function                            |
| <i>malG</i>      | <i>llmg_0737</i> | 4.36E-05    | -2.8 | maltose ABC transporter permease                       |
| <i>matR</i>      | <i>llmg_1371</i> | 6.58E-06    | -2.8 | maturase                                               |
| <i>llmg_1517</i> | <i>llmg_1517</i> | 8.35E-06    | -2.7 | putative acidic phosphatase                            |
| <i>recN</i>      | <i>llmg_1685</i> | 1.07E-05    | -2.7 | DNA repair protein                                     |
| <i>cluA</i>      | <i>llmg_1398</i> | 2.31E-05    | -2.7 | protein of unknown function                            |
| <i>llmg_1093</i> | <i>llmg_1093</i> | 2.56E-05    | -2.7 | protein of unknown function                            |
| <i>llmg_1467</i> | <i>llmg_1467</i> | 3.54E-05    | -2.7 | protein of unknown function                            |



|                      |                      |             |      |                                             |
|----------------------|----------------------|-------------|------|---------------------------------------------|
| <i>llmg_0510</i>     | <i>llmg_0510</i>     | 5.13E-06    | -2.7 | protein of unknown function                 |
| <i>ponA</i>          | <i>llmg_0511</i>     | 1.06E-05    | -2.7 | penicillin-binding protein 1A               |
| <i>llmg_0005</i>     | <i>llmg_0005</i>     | 0.000645883 | -2.7 | protein of unknown function                 |
| <i>rplN</i>          | <i>llmg_2373</i>     | 0.000259466 | -2.7 | ribosomal protein                           |
| <i>chiC</i>          | <i>llmg_2199</i>     | 3.08E-06    | -2.7 | acidic endochitinase                        |
| <i>llmg_pseudo77</i> | <i>llmg_pseudo77</i> | 5.57E-06    | -2.7 | pseudogene 77( hypothetical protein)        |
| <i>arcD2</i>         | <i>llmg_2307</i>     | 6.72E-05    | -2.7 | arginine deiminase pathway                  |
| <i>cstA</i>          | <i>llmg_0430</i>     | 3.83E-05    | -2.7 | carbon starvation protein A                 |
| <i>glnQ</i>          | <i>llmg_1943</i>     | 2.42E-05    | -2.7 | glutamine ABC transporter                   |
| <i>llmg_2483</i>     | <i>llmg_2483</i>     | 7.11E-06    | -2.7 | protein of unknown function                 |
| <i>gntK</i>          | <i>llmg_2468</i>     | 1.39E-05    | -2.7 | gluconate kinase, pentose phosphate pathway |
| <i>llmg_1391</i>     | <i>llmg_1391</i>     | 9.30E-06    | -2.6 | protein of unknown function                 |
| <i>orf18</i>         | <i>llmg_1390</i>     | 2.17E-05    | -2.6 | protein of unknown function                 |
| <i>mapA</i>          | <i>llmg_0745</i>     | 4.65E-06    | -2.6 | maltose phosphorylase                       |
| <i>ocd</i>           | <i>llmg_1149</i>     | 3.95E-05    | -2.6 | ornithine cyclodeaminase                    |
| <i>rlx</i>           | <i>llmg_1372</i>     | 1.08E-05    | -2.6 | relaxase LtrB                               |
| <i>rplB</i>          | <i>llmg_2380</i>     | 0.000163961 | -2.5 | ribosomal protein                           |
| <i>llmg_1093</i>     | <i>llmg_1093</i>     | 1.81E-05    | -2.5 | protein of unknown function                 |
| <i>snf</i>           | <i>llmg_2319</i>     | 5.47E-06    | -2.5 | helicase                                    |

S4. Significant expression changes of the genes during growth of MG1363 Lac<sup>+</sup> on lactose as compared to growth on undefined carbon sources of the rich M17 medium.

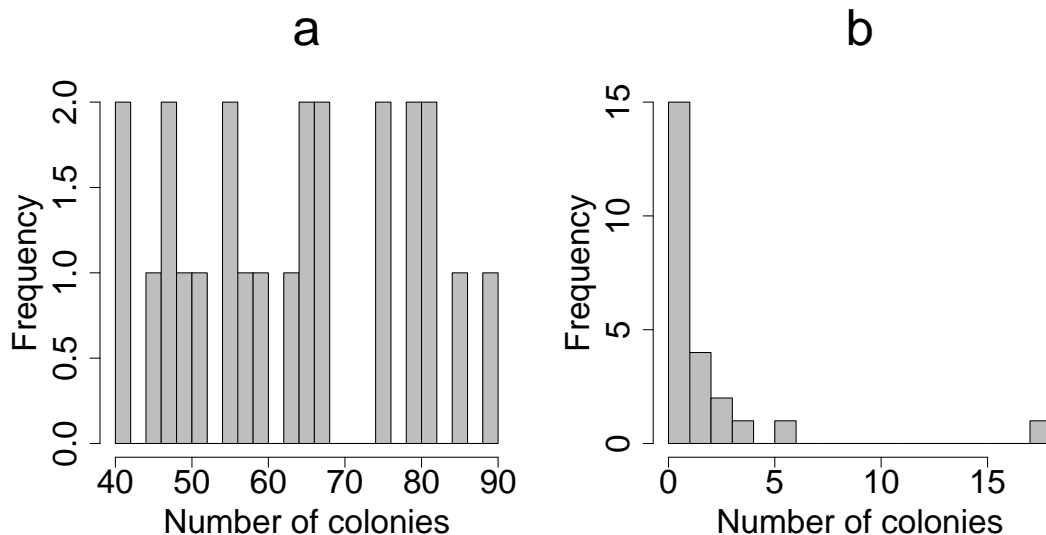

S5. Distribution of colonies on selective plates in a fluctuation assay. a. The number of MGLac<sup>+</sup> colonies on CDM supplemented with lactose after plating 24 individual cultures. b. The number of colonies on CDM supplemented with rifampicin after plating 24 individual cultures. The number of cells plated per culture in panel a was  $1.6 \times 10^8$ , while twice as many cells were plated for the cultures shown in panel b.

## References

1. **de Ruyter, P. G., O. P. Kuipers and W. M. de Vos.** 1996. Controlled gene expression systems for *Lactococcus lactis* with the food-grade inducer nisin. *Appl. Environ. Microbiol.* **62**(10): 3662-7.
2. **Gasson, M. J.** 1983. Plasmid complements of *Streptococcus lactis* NCDO 712 and other lactic streptococci after protoplast-induced curing. *J. Bacteriol.* **154**(1): 1-9.
3. **Kuipers, O. P., De Ruyter, P. G. G. A., Kleerebezem, and W. M. de Vos.** 1998. Quorum sensing-controlled gene expression in lactic acid bacteria. *J. Biotechnol.* **64**: 15-21.
4. **Larsen, R., G. Buist, O. P. Kuipers and J. Kok.** 2004. ArgR and AhrC are both required for regulation of arginine metabolism in *Lactococcus lactis*. *J. Bacteriol.* **186**(4): 1147-57.
5. **Pinto, J. P., A. Zeyniyev, H. Karsens, H. Trip, J. S. Lolkema, O. P. Kuipers and J. Kok.** 2011. pSEUDO, a genetic integration standard for *Lactococcus lactis*. *Appl. Environ. Microbiol.* **77**(18): 6687-90.
6. **Solem, C., E. Defoor, P. R. Jensen and J. Martinussen.** 2008. Plasmid pCS1966, a new selection/countersélection tool for lactic acid bacterium strain construction based on the oroP gene, encoding an orotate transporter from *Lactococcus lactis*. *Appl. Environ. Microbiol.* **74**(15): 4772-5.
